# Supplementary material for: Enhancing Climate Model Performance through Improving Volcanic Aerosol Representation
Source: Copernicus journal article supplement (doi:10.5194/egusphere-2024-1612), 2024-06-11
Supplement: Supplementary file 1 [file egusphere-2024-1612-supplement.pdf]

# Enhancing Climate Model Performance through Improving Volcanic Aerosol Representation

Ziming Ke<sup>1</sup>, Qi Tang<sup>1</sup>, Jean-Christophe Golaz<sup>1</sup>, Xiaohong Liu<sup>2</sup>, and Hailong Wang<sup>3</sup>

<sup>1</sup>Lawrence Livermore National Laboratory, Livermore, CA, USA

<sup>2</sup>Texas A&M University, College Station, TX, USA

<sup>3</sup>Pacific Northwest National Laboratory, Richland, WA, USA

Correspondence to: Ziming Ke (ke2@llnl.gov)

## Supplement Materials

Table S1. Correlation between observed and simulated surface temperature.

|        | 1940-1959 | 1960-1980 | 1940-1980 |
|--------|-----------|-----------|-----------|
| V2     | 0.15      | 0.32      | 0.30      |
| V2-IVA | 0.38      | 0.40      | 0.38      |

Table S2. Same as Table 4 but for comparison between V2-IVA and V2-IVA-NPI.

| V2-IVA - V2-IVA-NPI                          | 1940-1959                     | 1960-1979                   |
|----------------------------------------------|-------------------------------|-----------------------------|
| Net Cloud Forcing (W/m <sup>2</sup> )        | 0.099 (-0.611, -0.710)        | 0.016 (-0.985, -1.001)      |
| Low Cloud Fraction (%)                       | <b>-0.133</b> (0.131, 0.265)  | -0.032 (0.369, 0.401)       |
| Cloud Liquid Water Path (kg/m <sup>2</sup> ) | -9.65 E-05 (9.73E-4, 1.07E-3) | -1.03E-4 (1.48E-3, 1.58E-3) |
| Surface T (°K)                               | <b>0.089</b> (0.004, -0.084)  | 0.052 (-0.190, -0.242)      |
